# Supplementary material for: Transcriptome Analysis Revealed Potential Genes of Skeletal Muscle Thermogenesis in Mashen Pigs and Large White Pigs under Cold Stress
Source: Preprints.org preprint supplement (doi:10.20944/preprints202309.0698.v1), 2023-09-12
Supplement: Supplementary file 1 [file supplementary]

Archive with 2 entries (2 files):
- Supplementary files/Supplementary Figures.pdf
- Supplementary files/Supplementary Tables.xlsx
