# Supplementary material for: Transcriptome Analysis Revealed Potential Genes of Skeletal Muscle Thermogenesis in Mashen Pigs and Large White Pigs under Cold Stress
Source: Preprints.org preprint supplement (doi:10.20944/preprints202309.0698.v1), 2023-09-12
Supplement: Supplementary file 1 [file supplementary › Supplementary files/Supplementary Tables.xlsx]

## Sheet: Table S1
The sequences of siRNA for PRSS8
Sequence name	Sequence (5′→3′)	Target gene	Length/bp
si-ssc-PRSS8_001	TCAACTACAATGGCGAACA	PRSS8	19
si-ssc-PRSS8_002	CCTGTAACTGCCTATATAA	PRSS8	19
si-ssc-PRSS8_003	CTACGCCTCCTGGATTCAA	PRSS8	19

## Sheet: Table S2
Table S2 Primer information
Primer name	Primer sequence	Product length/bp	Annealing temperature/℃
	(5′→3′)
ARRDC3	F: TGAGGTTCACAGGTGTATTCCA	249	60
	R: TCCACAAGGAAGAGCAATAGGA
ADRB2	F: TGTGCAGGAGGAGGAACATC	276	60
	R: GGTGCAGGAAGGAAGGTCTC
CEBPB	F: TGAGGTTCACAGGTGTATTCCA	249	60
	R: TCCACAAGGAAGAGCAATAGGA
NR1D1	F: CAAAAGGCGGCTGAGATTGG	242	60
	R: GTAGCAAGAAGGGTCGGGTC
SIK1	F: CGGCATCGAGTCACCAAAAC	258	60
	R: GAACTTCTTGCGGGCTTCAC
ACTC1	F: GAGAAGCTGTGCTATGTTGCC	181	60
	R: TGCCAGCAGATTCCATACCAA
PRSS8	F: CTTAGGTGCCCGGTGTCTTC	190	60
	R: CGCCTGTAATCCGTCCTTGT
IL18	F: ATGGCTGCTGAACCGGAAG	94	60
	R: GGTCTTCATCGTTTTCAGCTACA
SLN	F: GGATGCACTGAGGTCCACAA	163	58
	R: TCCTGAACAGCGTCAAGGAC
UCP3	F: AGCATCACCACCCGGATTTT	159	60
	R: GGTCCTGTAGGCATCCATCG
PGC1α	F: TGCAACCAGGACTCTGTATGG	300	60
	R: GGGCAATCCGTCTTCATCCA
GLUT1	F: GCCTGTTTGTGAACCGCTTT	97	60
	R: CCCAGTTTGGAGAAGCCCAT
GLUT4	F: GGCCATCGTCATTGGCATTC	210	60
	R: GTCAGGCGCTTCAGACTCTT
PFK	F: AGGCAGGAAGCAGTATGA	387	58
	R: AAGTCAGTGGTGTAGTTCTC
PKM	F: CCCAGAAACCAAGCAGCAAC	110	60
	R: ATGGTGTAGCCCAGAAGTGC
HADHB	F: CTGGGTCAGCGACTGTCTTT	160	60
	R: CGTACTCATCCTGCTCCGAC
CPT1B	F: AGGCCTCATCAAGAAGTGCC	183	60
	R: TGAACGAAGGCTGTGGACTC
SERCAα2	F: TCATGGAGGCTCCTGGATCA	187	60
	R: AGTGCAACCAAGGGTTTCCA
CASQ2	F: AGAGGCAGCTGAACACTTCC	140	58
	R: TGTCAGGGATGACAATGGGC
LDHA	F: GAAGTGCACTCCCGATTCCT	189	60
	R: CGAGAGCAATTTCATCCGCC
LDHB	F: TTCACTCCTCTGCGCACAAT	282	60
	R: ACATCCACCAGAGCAAGCTC
18S rRNA	F: CATGCATGTCTAAGTACGCACGG	200	60
	R: AGGCTGACCGGGTTGGTTTTGAT

## Sheet: Table S3
Table S3 Body weight changes of Large White pig and Mashen pig at 25℃ and 4℃
	Mashen pig		Large White pig
	25℃	4℃	25℃	4℃
Initial weight (kg)	36.55±2.32	41.3±3.61	31.1±1.19	35.64±2.84
Final weight (kg)	41.72±3.60	38.32±3.23	31.725±1.03	34.35±2.51
Weight gain (kg)	5.17	-2.98	0.625	-1.29

## Sheet: Table S4
Table S4 Overview of the reads and quality filtering of mRNA in LW and MS pig at 25℃ and 4℃
Sample	Raw data (bp)	BF_Q20 (%)	BF_Q30 (%)	BF_GC (%)	Clean data (bp)	AF_Q20 (%)	AF_Q30 (%)	AF_GC (%)
LW1	8487025800	97.6	93.74	54.93	8397110015	97.84	94.03	54.89
LW2	8939098200	97.82	94.25	55.59	8825299333	98.06	94.55	55.56
LW3	9245585400	97.83	94.31	55.48	9124950468	98.08	94.62	55.44
LW4	7471263300	97.83	94.17	54.13	7387442287	98.04	94.47	54.09
LW5	9901636500	97.78	94.23	54.47	9764296906	98.05	94.57	54.43
LW6	8107192800	97.87	94.3	55.05	8011578301	98.1	94.58	55.03
MS1	6728658600	97.5	93.57	52.62	6641080690	97.75	93.88	52.59
MS2	8389753500	97.74	94.08	54.27	8300213901	97.98	94.38	54.25
MS3	8567391600	97.78	94.17	54.31	8470254892	98.01	94.46	54.28
MS4	8908222800	97.78	94.25	54.51	8794814095	98.05	94.57	54.48
MS5	7729582800	97.81	94.21	52.49	7634154952	98.06	94.52	52.45
MS6	6752216400	97.77	94.15	53.26	6663641451	98.02	94.46	53.22

## Sheet: Table S5
Table S5 The common cold resistance genes of LW and MS pigs at 25℃ and 4℃
Symbol	LW-25-VS-LW-4		MS-25-VS-MS-4		The average log2(FC)	The average FDR
	log2(FC)	FDR	log2(FC)	FDR
NR4A2	2.84379	4.06e-22	2.60567	0.00255	2.72473	0.001275
GPCPD1	2.25409	1.37e-09	2.3315	0.00643	2.29279	0.003215
PNRC1	2.17228	2.1e-25	1.35713	0.004	1.76471	0.002
CIART	2.10997	5.23e-12	1.89059	0.0296	2.00028	0.0148
SIK1	1.85831	3.69e-07	2.02377	0.0249	1.94104	0.0124502
AGBL1	1.848	1.31e-06	1.65025	0.00337	1.74913	0.00168566
ARRDC3	1.79346	2.29e-10	1.55672	0.00835	1.67509	0.004175
KLF10	1.70616	9.43e-09	1.18502	0.0496	1.44559	0.0248
ZFAND5	1.55659	1.13e-33	1.44122	0.000898	1.49891	0.000449
HSPB7	1.5329	3.79e-14	1.37799	0.000371	1.45545	0.0001855
ARRDC2	1.47076	1.83e-15	1.53461	0.0417	1.50269	0.02085
NR1D1	1.44361	8.24e-05	1.42606	0.027	1.43483	0.0135412
CEBPB	1.44093	2.3e-18	1.33328	0.0328	1.3871	0.0164
RCAN1	1.36665	1.84e-12	2.12001	0.00956	1.74333	0.00478
TIPARP	1.19896	7.43e-08	1.18093	0.00152	1.18994	0.000760037
BCL2L11	1.15974	0.0321	1.20932	0.0143	1.18453	0.0232
ADRB2	1.19064	2.06e-07	1.61176	0.00159	1.4012	0.000795103
CNTFR	-1.00547	0.00089	-1.71759	1.91e-05	-1.36153	0.00045455
CIDEC	-1.94612	2.17e-18	-2.25171	0.0179	-2.09891	0.00895
SCD	-3.09566	5.07e-30	-2.13491	0.0205	-2.61529	0.01025
LEP	-3.82782	0.00103	-3.55325	0.0431	-3.69054	0.022065
MSTRG.9994	3.10442	8.98e-51	2.33159	0.0033	2.718	0.00165
MSTRG.14646	2.47207	2.23e-05	4.04669	0.0289	3.25938	0.0144612

## Sheet: Table S6
Table S6 The specific cold resistance genes of MS pigs at 25℃ and 4℃
Symbol	LW-25-VS-LW-4		MS-25-VS-MS-4
	log2(FC)	FDR	log2(FC)	FDR
LYZ	0.783447	0.374619	3.39674	0.00834831
LY6G6C	0.268489	0.887025	3.19024	0.00664356
NEFH	0.537028	0.863527	2.8594	0.00434551
LOC100523213	-0.95335	0.184775	2.38601	0.0202802
CILP2	-3.60422	0.141424	2.25376	0.028908
ANKRD1	0.305335	0.161163	2.11656	1.9113e-05
PRSS8	0.225881	0.893565	2.03814	0.00790425
LOC110261530	-0.512648	0.220754	1.87688	0.0387694
IL18	1.15849	0.151593	1.74208	0.00152458
KCNC4	0.453431	0.681901	1.45746	0.00664356
ACTC1	-0.739702	0.109437	1.43702	0.00399589
DUSP10	-0.117053	0.696563	1.23576	0.0077197
MSS51	-0.330798	0.444136	-1.08111	0.0416643
TIMP4	-0.928871	3.17782e-05	-1.26329	0.00608002
POLH	-0.907456	0.000264143	-1.43317	0.00399589
HBB	0.676706	0.620137	-1.46492	0.00588928
RFLNB	-0.98116	0.00191795	-1.47721	0.0400136
LOC100737768	0.405726	0.837134	-1.57452	0.00801911
ALAS2	0.444481	0.658924	-1.73207	0.00152458
HSP70.2	-0.310087	0.865167	-2.24439	0.000898352
RDH16	0.726435	0.646785	-3.59543	0.000898352
LOC102158401	0	0.978322	-4.11042	0.0022873
LOC110258215	-1.03953	0.683031	-4.5494	0.000898352

## Sheet: Table S7
Table S7 The specific cold resistance genes of LW pig at 25℃ and 4℃
Symbol	LW-25-VS-LW-4		MS-25-VS-MS-4
	log2(FC)	FDR	log2(FC)	FDR
MSTRG.5537	11.4357	0.000101948	7.96578	0.999466
MSTRG.10435	10.2368	7.37228e-05	0.339486	0.999466
MSTRG.8797	9.04985	0.0154358	4.05889	0.999466
CR1	6.12928	0.000696717	-0.584963	0.999466
FAM240C	6.08215	0.000514941	0.877872	0.999466
MSTRG.9559	5.8806	2.67314e-24	1.84327	0.999466
MSTRG.600	5.17991	0.0171587	2.40498	0.999466
PKHD1	4.90689	0.0208414	-1.73697	0.999466
LOC102159419	4.65821	0.000851342	0.0995357	0.999466
TEKT1	4.60204	0.000150972	2.9542	0.999466
LCT	4.24793	0.00131824	0.523562	0.999466
MSTRG.7134	4.22607	0.00436984	-2.05889	0.999466
LOC100736765	4.20105	6.36817e-12	3.08408	0.795574
MSTRG.1998	3.79099	0.000581339	0.686725	0.999466
MYLK3	3.73697	0.00295716	0.973033	0.999466
RNF207	3.71882	1.85375e-06	1.58496	0.950425
DEFB1	3.67544	0.000134896	0.0666298	0.999466
LOC106509573	3.58496	1.47309e-05	1.04731	0.999466
C13H3orf80	3.58496	0.0164884	0.538096	0.999466
MSTRG.6878	3.53916	0.00133872	1.54132	0.999466
LOC100525396	3.40599	0.000728932	-0.479168	0.999466
MRLN	3.37171	1.96282e-12	0.738927	0.999466
MSTRG.10947	3.16993	0.0295463	-0.145117	0.999466
TREH	3.07039	0.015496	0	0.999466
CSF3	3.06736	0.00155487	0.686501	0.999466
SLIT1	3.05889	0.0363628	0	0.999466
MSTRG.12809	3.03926	5.42612e-14	1.65208	0.391421
LOC100511639	3.03148	0.00219554	2.33442	0.999466
C1H6orf163	3.02554	0.00548291	7.12928	0.877574
MSTRG.534	3.005	0.0422723	1.54749	0.999466
LOC106505211	3	0.00713612	0.192645	0.999466
PRSS36	2.99139	0.0173803	0.752072	0.999466
RND1	2.90689	0.000386834	1.02722	0.999466
FBXO32	2.89356	2.21484e-06	1.45344	0.999466
ZNF750	2.87447	0.0044788	-0.408465	0.999466
IYD	2.80735	6.3132e-07	1.33065	0.999466
UCN	2.80735	0.0265336	0.481533	0.999466
PFKFB3	2.78985	1.69037e-20	0.774773	0.999466
RETREG1	2.75083	9.42969e-29	1.53322	0.124876
MSTRG.11910	2.72973	0.0212784	2.13364	0.999466
MSTRG.3924	2.70782	0.00457957	7.6677	0.999466
C14H10orf10	2.68691	2.57176e-18	1.50916	0.283698
LOC102168165	2.67807	0.000122264	1	0.999466
C6H1orf64	2.57289	0.00650688	-0.459432	0.999466
MSTRG.9471	2.56435	1.1615e-06	0.452512	0.999466
MSTRG.8581	2.55565	6.32593e-05	2.98446	0.386959
MSTRG.14810	2.55503	1.38458e-15	1.33826	0.881282
LOC100737508	2.51096	0.0105338	2.46512	0.520151
OTUD1	2.48876	3.35149e-23	1.7439	0.999466
SEC14L5	2.45943	2.0594e-08	1.33464	0.085443
RASGEF1B	2.43124	1.8501e-23	0.658629	0.750392
LOC100152206	2.42321	0.0134889	0.534336	0.999466
TMEM140	2.42178	1.25544e-22	0.635088	0.999466
MSTRG.7298	2.41626	0.0122126	2.75489	0.999466
OAS1	2.36436	2.79292e-12	0.99737	0.999466
ESRRG	2.33298	2.64671e-08	1.07595	0.999466
GALNT15	2.31878	4.65513e-10	0.428039	0.999466
NKAIN1	2.29708	1.61195e-14	-0.046489	0.999466
APOD	2.28878	1.15907e-13	-0.156284	0.999466
CCL26	2.27798	1.29595e-05	0.499032	0.999466
LOC100158121	2.26849	0.012253	1.42701	0.999466
APOLD1	2.26405	5.35983e-06	0.981934	0.999466
DDC	2.26185	2.35998e-05	1.078	0.999466
CXCL1	2.22677	0.00793612	-0.135227	0.999466
KIAA0408	2.22363	4.41812e-24	0.726982	0.999466
AKR1CL1	2.19988	2.73649e-23	0.744775	0.999466
MAFF	2.19921	5.40075e-11	1.49626	0.255886
MSTRG.1896	2.1861	8.21341e-05	1.73807	0.606841
MSTRG.3032	2.15579	0.0332699	0.0693211	0.999685
MSTRG.9995	2.1375	0.0186924	2.88264	0.986026
PDK4	2.12203	1.80161e-18	1.61446	0.999466
B3GALT1	2.11548	0.00190243	0.350497	0.999466
SDCBP2	2.10309	0.0129099	0.479168	0.999466
FNTB	2.0869	4.6665e-14	0.52121	0.999466
GPAT2	2.06301	0.00108465	-0.268196	0.999466
CYP1A1	2.06258	5.07532e-08	1.20972	0.737851
CEBPD	2.06017	3.9135e-14	0.938526	0.999466
MSTRG.13476	2.0581	0.0240868	0.766203	0.999466
GADD45G	2.05169	3.18111e-11	1.79015	0.0656429
MSTRG.9075	2.04182	0.00628283	1.19185	0.999466
GPR160	2.03814	0.00609012	0.361188	0.999466
LOC100626097	2.03242	0.000746393	0.688056	0.999466
PLIN5	2.0106	2.91217e-17	0.659043	0.999466
GPR31	2	0.0466978	1.24793	0.999466
ZFP36	1.97798	1.47426e-11	0.0570613	0.999466
KLHL38	1.97547	3.07142e-13	0.970463	0.608471
AQP4	1.96911	0.00147289	-0.699522	0.999466
KLF15	1.95608	4.92204e-34	0.894384	0.733572
FBXO30	1.95233	1.35897e-29	1.10908	0.493719
INAFM1	1.94673	0.0455019	0.254475	0.999466
IRS2	1.93369	8.22724e-11	1.12626	0.750392
CABP1	1.93074	0.0361344	0.510738	0.999466
ADAMTS4	1.91956	5.39997e-10	0.143222	0.999466
CYR61	1.90883	0.0102422	1.01514	0.999466
ABHD18	1.88835	4.11954e-05	0.852246	0.999466
MSTRG.5455	1.8705	0.00355996	1.80971	0.736791
TGM5	1.87036	0.0134271	-0.202105	0.999466
LOC110260827	1.87009	0.0146476	0.117108	0.999466
MSTRG.6986	1.86472	0.0129741	0.177998	0.999466
MSTRG.42	1.85823	0.031663	0	1
UGP2	1.85269	2.43979e-16	0.64377	0.877574
LOC110255568	1.84927	2.5678e-05	1.07238	0.999466
CPLX1	1.848	0.0382732	0.394631	0.999466
AMPD3	1.84558	5.42085e-09	0.700288	0.999466
MSTRG.11996	1.84221	0.00147388	0.73105	0.999466
CSRNP1	1.83515	5.15019e-28	1.51576	0.392232
MTHFD2L	1.82852	0.00824345	1.34395	0.999466
SMPDL3A	1.82468	3.65226e-09	-0.481127	0.999466
FOXD3	1.81526	0.0129099	0.326501	0.999466
RGS1	1.81061	0.00573686	1.53975	0.406605
C17H8orf4	1.80629	0.0258757	0.816051	0.999466
STC1	1.78833	0.0015122	-0.190477	0.999466
MICAL2	1.77505	2.40059e-32	-0.316035	0.999466
SLC4A10	1.77259	0.0371547	1.52725	0.999466
ANXA8	1.75681	0.00484335	-0.304855	0.999466
SLC4A11	1.73697	0.00777235	0.605721	0.999466
MSTRG.15095	1.72163	0.0245339	1.93664	0.999466
CREM	1.71125	1.18497e-24	1.56919	0.110168
ASB4	1.7112	1.16431e-15	0.681381	0.999466
GADD45B	1.70929	1.38949e-23	1.70418	0.0656429
LOC110261065	1.70652	0.0115077	0.520832	0.999466
SORBS1	1.68845	2.60858e-11	0.0822383	0.999466
FAM167B	1.67888	3.08972e-07	0.547217	0.999466
BTG2	1.66692	1.22852e-12	0.491258	0.999466
MYOZ2	1.65866	1.04497e-07	0.999113	0.208998
GPX3	1.65487	3.76543e-05	-0.0511577	0.999466
MSTRG.6998	1.65412	0.0134443	0.832753	0.999466
KCTD6	1.64689	3.47077e-16	1.0096	0.889825
KLF4	1.63613	1.96527e-13	0.444432	0.999466
ARID5B	1.63274	2.36976e-10	0.784022	0.999466
HES1	1.60772	2.49348e-05	1.36153	0.573015
MSTRG.4384	1.60436	0.0235925	1.48568	0.969385
LSR	1.60145	0.00314774	0.452068	0.999466
DIO2	1.57333	0.00011558	1.60145	0.155319
LYVE1	1.572	0.00149351	-0.323959	0.999466
PKP2	1.56986	0.00831176	-0.0395284	0.999466
GLUL	1.56244	2.55372e-21	0.497251	0.999466
LOC100621492	1.56071	0.0404204	1.96153	0.597393
BHLHE41	1.55902	1.97982e-16	0.795609	0.750392
KBTBD13	1.55102	0.0188548	-0.0239789	0.999466
MYF6	1.54948	4.32463e-40	1.19378	0.608471
MAOB	1.54612	3.36167e-09	0.511347	0.999466
MSTRG.6821	1.54315	1.66703e-07	0.86225	0.969385
INSIG1	1.54238	1.4655e-06	0.499979	0.999466
PANK1	1.53967	0.00134995	0.395929	0.999466
PLCD1	1.53413	1.36174e-06	-0.170157	0.999466
PNPLA4	1.53218	0.0136187	0.733893	0.999466
FABP3	1.52843	3.96506e-22	0.897688	0.540503
DDIT4	1.52557	1.249e-09	1.27131	0.284234
CCDC160	1.5091	4.21835e-05	0.92809	0.999466
FOS	1.50035	0.000525932	0.764949	0.999466
PKIB	1.49726	0.000636583	0.579494	0.999466
TEC	1.49615	0.034369	-0.268817	0.999466
RSC1A1	1.49605	1.87196e-20	0.222774	0.999466
MSTRG.12755	1.49361	0.00810875	0.88158	0.999466
TP63	1.48297	1.83617e-09	0.0692904	0.999466
MSTRG.98	1.47371	0.000657793	0.977659	0.999466
EGLN3	1.47349	6.99598e-09	0.341037	0.999466
STRIT1	1.47314	0.00705657	0.477119	0.999466
OSR2	1.46395	1.23144e-07	0.0985818	0.999466
STEAP4	1.46328	0.00390366	0.431716	0.999466
LNX1	1.46133	0.00182611	0.255257	0.999466
ETFDH	1.45505	8.12304e-20	0.60806	0.999466
CEACAM16	1.45038	0.000250656	0.83987	0.999466
ABHD4	1.45007	3.71316e-17	0.571678	0.999466
PTPN3	1.44805	6.60104e-05	0.166942	0.999466
LOC100518827	1.42783	0.0375529	1.67634	0.493719
GRAMD2A	1.4244	0.010213	0.295233	0.999466
MSTRG.8666	1.42077	3.00849e-05	1.04017	0.777647
MYBPC1	1.41883	1.5214e-25	0.31576	0.999466
NT5C3A	1.41113	4.49722e-07	0.867703	0.883249
PLK3	1.40498	0.0262861	1.08972	0.438556
UCHL1	1.39478	0.00113247	1.20637	0.829392
SLC16A9	1.39348	0.00810875	-0.0658021	0.999466
SNAPC1	1.38933	0.00648947	0.750022	0.999466
ID4	1.38777	0.0321782	-0.0371698	0.999466
IRX3	1.38262	5.70242e-05	0.581305	0.999466
TLCD2	1.38187	0.0102292	0.424498	0.999466
TRIM63	1.38153	2.79292e-12	1.25969	0.357141
HSPB3	1.37898	4.9658e-07	1.09637	0.10613
ZBTB10	1.3756	3.24321e-09	0.473095	0.999466
ASB5	1.37305	5.47967e-06	0.883791	0.124876
SLC19A2	1.37104	0.00152586	0.934023	0.930934
IER5	1.3636	3.72908e-12	0.837754	0.999466
CA9	1.35832	3.93764e-05	0.332575	0.999466
NEDD4L	1.35788	1.35833e-11	0.26636	0.999466
FRRS1L	1.35614	0.0255304	0.049753	0.999466
ANKRD37	1.35484	0.00689304	0.323363	0.999466
HPSE	1.35364	0.0394236	1.62678	0.789198
LYSMD2	1.35007	3.78821e-07	0.581223	0.999466
NDRG2	1.33799	2.43979e-16	0.306419	0.999466
CLEC2B	1.33797	0.000487845	0.547298	0.999466
SLC46A3	1.33095	7.96202e-06	-0.210009	0.999466
SLC2A5	1.3295	4.49088e-05	0.628806	0.999466
Pol	1.32765	0.00171334	1.37551	0.999466
MAP1LC3A	1.32604	5.79649e-10	0.464708	0.999466
ACADVL	1.32303	7.69094e-26	0.646854	0.999466
HSD11B1	1.32146	3.4189e-05	0.179745	0.999466
DEDD2	1.31466	1.43288e-05	0.218323	0.999466
CD5L	1.31431	0.0313963	0.465851	0.999466
SNAI3	1.31338	0.0186924	1.35364	0.684141
HADHB	1.30543	2.92845e-24	0.640855	0.950425
NEK3	1.29802	0.0190225	0.929922	0.999466
COQ8A	1.29779	1.05466e-22	0.321973	0.999466
SLC25A34	1.29718	2.44344e-08	-0.535601	0.999466
RILP	1.29624	1.62449e-11	0.652867	0.999466
TRUB1	1.28824	0.0386144	0.871267	0.999466
CTH	1.27462	0.0037625	0.964711	0.950425
LOC110257484	1.27444	0.00909463	-0.0689474	0.999466
SLC25A4	1.27181	7.67144e-14	0.862297	0.24623
IL6R	1.27147	5.69728e-08	0.464174	0.999466
CASTOR2	1.26972	1.33989e-06	0.199362	0.999466
ZIC1	1.26076	1.3796e-06	0.349197	0.999466
TP53INP1	1.26046	4.19497e-09	0.750561	0.872233
DNASE1L3	1.25427	8.7965e-05	0.253329	0.999466
AFG1L	1.25418	0.00263708	0.286471	0.999466
DDIT4L	1.25128	1.64595e-08	0.905745	0.493719
RHBDD3	1.24741	2.27818e-05	0.792627	0.947009
SOX17	1.24014	0.00145615	0.723234	0.999466
SLC16A10	1.23934	6.90363e-06	0.260714	0.999466
C4BPA	1.2376	1.70259e-05	0.39461	0.999466
GOT1	1.2372	1.04955e-14	0.339678	0.999466
HBP1	1.23712	2.27275e-17	0.580886	0.875354
CCDC110	1.2362	0.00626695	1.36643	0.957194
LOC110256708	1.23538	0.000474449	0.876048	0.999466
MYH2	1.23099	4.78853e-07	-0.607772	0.999466
ITGA2B	1.22948	0.0115162	0.123575	0.999466
MSTRG.11277	1.22519	0.000871409	0.804131	0.999466
KLHL24	1.22299	1.14229e-14	0.76767	0.736791
SLC9B2	1.22239	0.0136351	0.21434	0.999466
MID1IP1	1.22191	6.65516e-18	0.397955	0.999466
CD36	1.22169	4.27934e-21	0.161339	0.999466
LOC102159655	1.2209	5.3354e-05	0.668534	0.999466
FAM43B	1.2147	0.0044788	0.347373	0.999466
CYP27A1	1.21326	2.52206e-08	0.528777	0.999466
CA4	1.212	8.98217e-10	-0.0347278	0.999466
HOMER3	1.20312	2.53152e-08	0.0505868	0.999927
PYGO1	1.20201	6.28629e-09	0.635462	0.903618
SLC43A2	1.20093	2.79292e-12	0.956937	0.512783
NUPR1	1.20039	0.00410512	0.910571	0.475808
BMP4	1.19979	0.0166836	0.499291	0.999466
ABCA5	1.19747	2.46703e-06	0.677421	0.999466
TMEM145	1.19304	0.0166926	0.980169	0.59279
MMP24	1.1913	0.0133526	0.891624	0.999466
CPT2	1.18789	1.01679e-05	0.481148	0.999466
COX5B	1.18543	2.61848e-15	0.58883	0.999466
CCDC71L	1.18168	0.00511234	1.07451	0.433766
C13H21orf59	1.17859	3.66e-08	0.714249	0.999466
ZNF385D	1.17801	4.67872e-06	1.08863	0.496379
ACSL1	1.17723	1.04955e-14	0.876612	0.608471
DCUN1D1	1.17497	6.3132e-07	0.359649	0.999466
IRF2BP2	1.17472	3.34448e-11	0.851465	0.755624
DHRS3	1.1738	2.39184e-07	0.48058	0.999466
S100A1	1.16905	3.78821e-07	1.02164	0.317894
FAM214A	1.16793	5.20054e-08	0.808876	0.831774
C4H8orf76	1.16715	0.000422644	0.858644	0.756334
FLYWCH2	1.16636	0.0401814	1.32319	0.40991
CLIP4	1.16514	0.0216601	0.45753	0.999466
SESN1	1.16397	2.79292e-12	0.124696	0.999466
LOC102159510	1.16175	0.00146666	-0.046276	0.999466
UCP3	1.16123	6.74713e-06	0.826735	0.999466
ANGPT4	1.158	0.00189582	-0.174029	0.999466
HMOX2	1.15732	1.5163e-07	0.334278	0.999466
PCMTD1	1.15287	1.07424e-13	0.188464	0.999466
RHCG	1.14964	0.0142141	-0.502094	0.999466
MAP1LC3B	1.14954	4.44639e-11	0.487196	0.999466
ACADM	1.148	1.13981e-08	0.422255	0.999466
HK2	1.14619	0.000546628	-0.12009	0.999466
ETS2	1.14452	7.52844e-11	0.771191	0.983564
CUNH14orf2	1.14432	1.47309e-05	0.376899	0.999466
KLF6	1.14415	1.03119e-06	0.631346	0.969385
CLK4	1.14411	6.0593e-05	0.0901978	0.999466
STOML1	1.14344	0.00788184	0.671377	0.999466
MSTRG.10436	1.14259	0.0173721	0.303312	0.999466
NFKBIA	1.14076	1.23144e-07	0.68593	0.969385
OLFM1	1.14073	3.34793e-05	-0.0814641	0.999466
GSAP	1.14011	0.0048454	0.678072	0.999466
COQ10A	1.14009	8.55135e-20	0.872627	0.241715
NME7	1.13797	2.76605e-05	1.0827	0.999466
FOXP1	1.13616	9.55971e-13	0.498939	0.999466
FMO2	1.13606	0.000741463	-0.809199	0.915378
PAIP2B	1.13174	0.000320537	-0.301054	0.999466
NFIL3	1.12739	1.13919e-05	-0.485427	0.999466
SAR1B	1.12252	1.5488e-15	0.63806	0.999466
CD302	1.11923	0.042324	-0.464551	0.999466
MPC2	1.11732	4.22221e-13	0.316603	0.999466
SAP30	1.11146	2.42415e-05	0.190606	0.999466
WDR17	1.11103	0.0186924	-0.584963	0.999466
CST6	1.10592	0.0324896	0.30355	0.999466
CKMT2	1.10458	2.69569e-05	0.218291	0.999466
ATPIF1	1.10338	1.63445e-14	0.412326	0.999466
ECH1	1.10252	4.3437e-13	0.491029	0.999466
COQ10B	1.09883	0.00013864	0.987199	0.909566
MTFP1	1.09679	7.98651e-05	0.642357	0.999466
NOSTRIN	1.09672	0.00449675	0.086264	0.999556
SMPX	1.09145	1.40268e-09	0.734815	0.789198
HSDL2	1.09008	1.46707e-07	0.543883	0.996747
NDUFA4	1.08917	2.79292e-12	0.595108	0.983564
SPRYD7	1.08827	3.72512e-05	0.24076	0.999466
TPM3	1.08806	2.19077e-05	0.568703	0.999466
CEP85	1.08338	3.6135e-09	0.328335	0.999466
PLA2G7	1.08174	4.20495e-05	0.515349	0.999466
CRYAB	1.08104	5.92382e-07	0.196105	0.999466
GTPBP10	1.08084	1.05948e-05	0.64624	0.999466
GADD45A	1.07788	2.02517e-06	0.481326	0.999466
MXI1	1.07566	1.20802e-08	0.361691	0.999466
KCNIP2	1.07482	0.0247353	0.108997	0.999466
HIGD1A	1.07078	7.34928e-07	0.597647	0.999466
C2H11orf96	1.06683	8.05911e-07	1.03317	0.894327
NDUFB9	1.06614	5.66665e-10	0.5305	0.999466
HOMER2	1.06534	2.26761e-06	-0.0200641	0.999466
DBT	1.06245	2.44377e-06	0.219285	0.999466
TAS1R1	1.06158	0.0247398	0.325576	0.999466
MPV17L2	1.0602	5.57058e-08	0.445783	0.999466
HSPBAP1	1.05915	0.00679832	0.841038	0.881282
IFIT1	1.05641	0.029643	1.00149	0.969385
PSME4	1.05614	9.49035e-08	0.208007	0.999466
EAPP	1.05598	6.07252e-06	0.633982	0.915378
NAMPT	1.04952	5.81692e-07	0.491356	0.999466
MTRF1L	1.04741	0.0208035	0.847095	0.999466
SOCS3	1.04701	1.28977e-06	-1.18599	0.999466
WDR54	1.04657	0.00323817	0.771925	0.999466
ACYP2	1.04628	1.84708e-05	0.556153	0.999466
IRS1	1.04515	2.74884e-09	-0.0262889	0.999466
SLA-3	1.04399	8.51529e-09	-0.324964	0.999466
PPARGC1A	1.04302	0.0228281	0.134426	0.999466
PROCR	1.04206	0.0218927	-0.341825	0.999466
CCDC68	1.04069	0.00077112	0.561782	0.999466
ARID5A	1.03966	7.1368e-05	0.938828	0.284234
SSX2IP	1.03922	0.000955027	0.1242	0.999466
PCTP	1.03708	0.0035227	0.456498	0.999466
MINOS1	1.03616	1.43323e-11	0.508769	0.999466
ATP5L	1.03558	3.08635e-11	0.571997	0.999466
ARNTL	1.0338	0.00100895	-0.887626	0.999466
RAMP3	1.0337	0.0100541	-0.987774	0.999466
NUDT8	1.03218	0.0101045	0.528509	0.999466
DUSP14	1.02975	0.0114795	0.891066	0.789198
PLGRKT	1.02973	0.000296185	0.543066	0.958301
TTC39C	1.02834	0.0464741	0.0737097	0.999466
FAM131C	1.02714	0.0139312	0.415529	0.999466
FMO1	1.0264	7.70974e-06	-0.397216	0.999466
ADRA2C	1.02427	0.0190225	0.790633	0.999466
LAMTOR4	1.02362	5.58881e-10	0.378372	0.999466
VEZF1	1.0221	2.80361e-06	0.363185	0.999466
GREB1L	1.02203	0.0137873	0.945552	0.999466
FDFT1	1.02158	2.17184e-15	0.0873669	0.999466
PPM1D	1.01549	3.91014e-06	0.342193	0.999466
DDB2	1.01142	9.33514e-05	0.0591327	0.999466
PRKAG1	1.00883	2.58096e-09	0.363786	0.999466
DAPK2	1.00839	0.000109834	-0.125846	0.999466
ABRA	1.00777	0.0254931	1.13438	0.633538
MDH1	1.00766	6.7551e-17	0.384218	0.999466
MYL3	1.00678	3.52074e-06	0.40782	0.999466
KIAA1143	1.00615	0.0122176	0.807057	0.999466
KLF2	1.00504	0.00587578	0.282717	0.999466
NEURL1B	-1.00223	3.1519e-09	-0.585427	0.901727
PRRX2	-1.00435	0.0240868	0.353637	0.999466
DSP	-1.00439	0.00272535	-1.22867	0.999466
LOC641352	-1.00507	0.0342021	0.151244	0.999466
TMEM44	-1.01027	0.00156268	-0.407575	0.999466
IL33	-1.01063	0.0352769	-0.521913	0.999466
NPNT	-1.01083	0.000623057	-0.659387	0.999466
SH3TC1	-1.01342	0.0160375	-0.19388	0.999466
MFNG	-1.01414	8.02423e-08	-0.766502	0.671575
C1H14orf37	-1.01495	0.0245339	-0.19878	0.999466
TUBB	-1.01843	5.89008e-11	-0.0750829	0.999466
UGGT2	-1.02333	0.0078043	-0.420843	0.999466
HEG1	-1.02468	0.00503474	-0.246139	0.999466
IGF2	-1.02489	0.000901426	-0.191955	0.999466
ADGRG6	-1.02509	6.56555e-05	-0.508147	0.999466
ARHGAP11A	-1.02524	0.0365843	-0.00952277	0.999466
SMO	-1.02678	9.15216e-05	0.0454705	0.999466
SOX12	-1.02975	0.00361867	-0.71934	0.999466
DPF3	-1.03171	2.64817e-05	-1.06593	0.736791
MSTRG.8375	-1.03385	0.00207806	-0.293599	0.999466
FADS1	-1.03487	0.000153334	0.180969	0.999466
SEMA3B	-1.0357	0.0102422	-0.155167	0.999466
GPC6	-1.03602	0.000364554	-1.43235	0.883249
NES	-1.03735	0.00479883	0.275329	0.999466
CAPN6	-1.03776	7.93583e-07	0.318489	0.999466
ATP7B	-1.04008	0.00805563	-0.581448	0.999466
PPIC	-1.04057	7.73125e-09	-0.0862715	0.999466
MTHFSD	-1.04182	0.0247785	0.662605	0.789198
B3GLCT	-1.04323	0.00113681	-0.24552	0.999466
BGN	-1.04761	0.000237129	-0.234649	0.999466
TTYH3	-1.04841	1.14312e-10	-0.0864522	0.999466
NAALADL2	-1.04891	0.0435382	-0.490986	0.999466
PITPNM3	-1.04947	0.032135	0.234465	0.999466
RCOR2	-1.05112	0.0255688	0.0727848	0.999466
MYL9	-1.05531	4.85663e-06	-0.202058	0.999466
AOX1	-1.0578	0.0316347	-1.62953	0.488125
TRIM25	-1.06075	0.00147289	-0.208814	0.999466
ATAD2	-1.06103	0.00300526	-0.561116	0.999466
CSPG5	-1.06451	0.0235173	0.0636311	0.999466
RACGAP1	-1.06529	0.000126056	-0.267844	0.999466
ENTPD5	-1.06711	0.000461521	-0.445626	0.999466
SLC1A4	-1.07176	5.88355e-06	-0.563901	0.999466
COL3A1	-1.07431	0.000428326	-0.339558	0.999466
SLIT3	-1.07473	0.00975425	-0.82103	0.993718
HMCN1	-1.07549	0.0118815	-0.784987	0.613279
PYCR1	-1.07722	1.35039e-09	0.0182512	0.999466
FAM109B	-1.07825	0.000866284	0.284864	0.999466
DCHS1	-1.0816	2.68361e-07	-0.208947	0.999466
PRELID2	-1.08352	0.00169058	-0.630975	0.999466
TFPI	-1.08936	0.00210527	-0.955686	0.590835
PTPRF	-1.09039	4.98678e-05	-0.715792	0.999466
ARMCX2	-1.09236	0.0226228	0.102934	0.999466
SELP	-1.09249	0.0366757	-0.115848	0.999466
KIAA1211	-1.09433	0.00359753	0.156119	0.999466
STK26	-1.09605	0.0459116	-0.429586	0.999466
DBN1	-1.09651	1.02215e-07	0.130997	0.999466
MRC2	-1.0979	6.67352e-06	-0.308275	0.999466
SCARF2	-1.10257	5.35399e-06	-0.322538	0.999466
SH3PXD2B	-1.10292	1.78075e-07	0.0262051	0.999466
CEP290	-1.10309	0.0035262	-1.07566	0.608471
ADAMTS20	-1.10434	0.000131815	-1.08139	0.217485
ROBO1	-1.10535	4.64949e-05	-0.65355	0.999466
HEYL	-1.10625	8.37534e-09	0.0393834	0.999466
RNF24	-1.10692	0.00147346	-0.552541	0.999466
AEBP1	-1.10701	0.013595	-0.666104	0.999466
COLGALT1	-1.10703	9.98804e-14	-0.488122	0.999466
IVD	-1.10729	0.0020362	-1.35747	0.999466
NFATC2	-1.10977	0.00899052	0.107446	0.999466
KIF23	-1.11124	0.00844246	-0.358894	0.999466
TENM4	-1.11664	0.000166727	-0.401205	0.999466
MEST	-1.1169	0.00444719	-0.0997731	0.999466
ALG14	-1.11818	0.00132488	-0.133625	0.999466
PAK1	-1.11908	7.62602e-05	-1.18405	0.145851
ADAMTSL3	-1.1193	0.00176075	-1.1187	0.850485
ADAM12	-1.12262	7.85987e-05	-0.546174	0.999466
KIF22	-1.12343	0.000388807	-0.144928	0.999466
BEND3	-1.12928	0.031663	0.517399	0.999466
CMKLR1	-1.12993	3.88903e-06	-0.118181	0.999466
SYT7	-1.13289	0.00468912	-0.422024	0.999466
ITGB1BP2	-1.13343	0.00497073	-0.870902	0.0126529
DOCK5	-1.14086	0.012594	-0.777608	0.999466
KLHL3	-1.14359	0.0110633	0.0458037	0.999466
MALL	-1.14549	3.01362e-07	-0.573977	0.705751
MYH11	-1.15053	0.00018624	-0.794705	0.428764
CPQ	-1.15462	0.000315345	-0.419879	0.999466
FBLN7	-1.15818	1.23447e-05	0.12393	0.999466
FKBP10	-1.15923	0.000102448	0.195903	0.999466
ZNF683	-1.16008	0.0293307	0.798366	0.999466
LOXL3	-1.16227	0.0235541	-0.213222	0.999466
CCND1	-1.16532	0.000660981	-0.797611	0.983564
ASPM	-1.16559	0.0157186	-0.268489	0.999466
ST8SIA2	-1.16707	0.00079911	0.0470486	0.999466
CYS1	-1.17432	1.15384e-13	0.356995	0.999466
COL6A6	-1.1747	1.82005e-12	-0.549564	0.999466
LHFPL2	-1.17774	1.73824e-09	0.0871846	0.999466
ECT2	-1.17971	0.00372994	-0.597241	0.999466
AK5	-1.18133	0.0028396	0.124987	0.999466
SLC7A7	-1.1814	0.00185169	-0.493539	0.999466
PRC1	-1.18763	0.000545417	0.0778195	0.999466
LOC100520992	-1.19176	0.000108146	-0.456021	0.999466
BARD1	-1.19265	0.0312102	0.38247	0.999466
SLC6A4	-1.19555	0.0037584	-0.905849	0.397783
SMC2	-1.19944	0.00108254	-0.377638	0.999466
KCNE3	-1.20387	0.00219374	-0.234352	0.999466
EMILIN1	-1.20693	5.11094e-06	-0.15534	0.999466
CKAP2	-1.2076	0.00271237	-0.329417	0.999466
DKK3	-1.20959	0.0193061	-0.476296	0.999466
TUBA1B	-1.2102	1.69756e-09	-0.655546	0.983564
PLK1	-1.21042	0.0172904	0.394684	0.999466
TSPAN9	-1.21177	3.31718e-06	-0.00131613	0.999466
THY1	-1.21456	1.7025e-11	-0.270207	0.999466
CLEC11A	-1.21583	0.0206478	0.109684	0.999466
ZFYVE28	-1.21586	9.32153e-05	-0.498989	0.999466
ATP8B2	-1.22173	0.000302998	-0.345678	0.999466
CENPE	-1.22239	0.0405823	-0.783189	0.999466
ADAMTS9	-1.22275	1.17346e-14	-0.577185	0.999466
COL5A1	-1.22369	0.000112038	-0.617114	0.999466
SCIN	-1.22417	0.00685876	-0.427862	0.999466
L1CAM	-1.22549	0.000177485	-0.465664	0.999466
FN1	-1.22785	3.36989e-05	-0.632552	0.999466
MEOX1	-1.22835	1.89091e-07	-1.05835	0.0844941
SERTAD4	-1.23195	0.0381154	0.629018	0.999466
ADAMTS16	-1.23607	0.000768258	-0.334845	0.999466
FBXL21	-1.24576	0.0303372	-1.12102	0.999466
FBXL22	-1.24936	0.0105371	-0.622299	0.999466
E2F8	-1.25023	0.0475555	0.120294	0.999466
PBK	-1.25139	0.00278115	-0.378111	0.999466
OXTR	-1.25154	0.000338114	-0.144669	0.999466
CREB3L1	-1.25345	0.000246665	-0.140481	0.999466
S1PR3	-1.25526	0.00382817	-0.947051	0.999466
MINDY4	-1.25716	0.00946296	-0.46218	0.999466
MAP1B	-1.25987	0.000320888	-0.570396	0.999466
EMID1	-1.26139	0.00671527	0.137019	0.999466
CBL	-1.26303	0.0311426	-0.883903	0.999466
ARMCX4	-1.26534	0.0014097	0.0901978	0.999466
MSTRG.5709	-1.26628	0.000492287	-0.622	0.999466
SRPX	-1.26844	1.64168e-07	-0.606855	0.930934
NALCN	-1.27563	0.0124095	0.236606	0.999466
LOC100516957	-1.27652	0.0226284	-1.17403	0.999466
P2RX4	-1.27744	0.0162373	-0.639889	0.999466
UBE2C	-1.27924	0.0174172	0.200553	0.999466
SYNGAP1	-1.28011	0.0495314	-0.686501	0.999466
PLXNA3	-1.28255	2.41479e-05	-0.750022	0.939419
PYROXD2	-1.28331	0.000109449	-0.685029	0.999466
PDXP	-1.28445	0.00108254	-0.180059	0.999466
KIAA0754	-1.28445	0.0379021	-1.41409	0.999466
ATP10A	-1.28671	0.00461988	0.198546	0.999466
ADAMTS14	-1.29546	0.0456914	0.291766	0.999466
ALDH4A1	-1.29564	6.39422e-07	-0.662984	0.910198
RCN1	-1.29565	1.3063e-15	-0.403661	0.999466
MCM10	-1.29834	0.0203237	-0.430634	0.999466
RYR3	-1.30117	0.0125821	-0.728327	0.999466
RET	-1.30464	4.33246e-13	-0.540002	0.999466
MTHFD1L	-1.31499	0.000332136	-0.556011	0.999466
SFXN3	-1.31713	5.40724e-06	-0.326633	0.999466
TPBG	-1.32503	0.011875	-0.158827	0.999466
MCM3	-1.32882	2.21307e-05	-0.10124	0.999466
ELOVL6	-1.32976	1.75587e-14	-1.28845	0.397783
ITGA10	-1.33121	0.00887424	-0.260652	0.999466
UHRF1	-1.33552	0.0024216	-0.196397	0.999466
CACNA1G	-1.33703	0.028387	-0.0848889	0.999466
FAM180A	-1.34151	0.0200074	-0.712198	0.999466
MCM4	-1.34274	5.73255e-06	-0.0523484	0.999466
GTSE1	-1.34341	0.0147762	-0.0538669	0.999466
KCP	-1.34426	0.00024671	-0.0605415	0.999466
MCM2	-1.34534	1.9296e-05	-0.210851	0.999466
CCNB1	-1.34735	0.00112739	0.275832	0.999466
BUB1	-1.34933	0.0426871	0.343587	0.999466
P4HA3	-1.35815	0.0308552	0.478654	0.999466
C1QTNF6	-1.35921	0.00100496	0.117969	0.999466
FANCD2	-1.36009	0.000131815	0.161589	0.999466
CDK1	-1.36114	0.0173803	0.0959057	0.999466
AGMO	-1.36146	0.0323638	-1.54314	0.931052
DDR2	-1.37103	4.07718e-11	-0.667723	0.999466
PTK7	-1.37478	2.06008e-05	-0.227526	0.999466
MYO1D	-1.37511	0.000122306	-0.51929	0.999466
IGF1	-1.37619	5.30349e-07	-0.0625288	0.999466
TMEM231	-1.37638	0.00181526	0.211232	0.999466
ADRA1B	-1.3836	0.0175803	0.0763509	0.999466
TK1	-1.38377	0.00277121	-0.141615	0.999466
CKAP2L	-1.39079	0.0292258	0.279154	0.999466
CDCA5	-1.39486	0.000214066	-0.450313	0.999466
KIF20A	-1.40418	0.00077055	-0.0512253	0.999466
IGFBP5	-1.40691	5.28204e-05	-0.561915	0.999466
APLN	-1.40939	0.000612109	-1.49387	0.26126
LOC100522421	-1.41038	0.0101205	1.74911	0.273202
KCTD15	-1.41194	2.61848e-15	-1.0102	0.0961388
VASH1	-1.41195	3.01362e-07	-0.586031	0.999466
NHSL2	-1.4126	1.67702e-05	-0.26748	0.999466
CRABP2	-1.42281	0.0206343	0.306027	0.999466
MSTRG.8305	-1.42414	6.09563e-09	-0.424201	0.999466
E2F1	-1.42981	0.000632436	-0.936753	0.999466
HMMR	-1.4344	0.0422133	0.400538	0.999466
NREP	-1.4364	2.01153e-09	-0.269788	0.999466
AMPH	-1.43741	0.0240868	-1.14439	0.999466
CDC20	-1.43911	0.000270924	0.092945	0.999466
ADAMTS17	-1.43985	4.08384e-09	-0.042733	0.999466
KCNK13	-1.44194	0.00364767	-0.324272	0.999466
KIF4A	-1.442	0.00274633	0.104023	0.999466
NEK2	-1.44335	0.016749	-0.147104	0.999466
LOC100519997	-1.44431	5.16981e-12	-0.321667	0.999466
MYBL2	-1.44612	5.56689e-05	-0.0410273	0.999466
SAMD11	-1.44665	0.0054058	-0.247473	0.999466
PHF19	-1.44999	1.00099e-06	-0.315958	0.999466
CENPN	-1.45418	0.0309	0.320178	0.999466
LGI3	-1.45943	0.0385222	-0.182203	0.999466
C3H2orf40	-1.46059	0.0174345	-0.0266586	0.999466
PNCK	-1.47273	0.0106089	-0.410788	0.999466
OLFML2A	-1.47799	2.82227e-07	-0.384597	0.999466
TCF19	-1.48981	7.40259e-05	-1.27744	0.903618
KIFC1	-1.49161	0.000121953	0.361266	0.999466
IQGAP3	-1.49643	3.83821e-07	-0.26096	0.999466
SLC2A10	-1.50043	0.00157626	-0.416585	0.999466
MKI67	-1.50197	7.26432e-07	-0.0429974	0.999466
LOC100152327	-1.50312	0.035102	-0.638245	0.999466
TMEM45A	-1.50546	0.00401756	-0.083416	0.999466
RBP1	-1.51134	0.004262	-0.446042	0.999466
KCNMB4	-1.51245	0.0120776	-0.465123	0.999466
SPAG5	-1.51265	0.00395242	-0.321928	0.999466
CCNA2	-1.52162	0.00258966	0.0632424	0.999466
RECQL4	-1.52793	0.0260396	0.104697	0.999685
SAPCD2	-1.52947	0.000675308	-0.106199	0.999466
ADGRB2	-1.52973	0.000453566	-0.133524	0.999466
ORC1	-1.53	0.00341891	-0.132682	0.999466
KIF2C	-1.53051	1.12361e-06	0.0845335	0.999466
AKAP5	-1.53605	0.0408974	-0.854802	0.999466
NCAPG	-1.54057	0.0124196	-0.727315	0.999466
ROR2	-1.54205	5.61667e-05	-0.0361597	0.999466
GZMH	-1.55117	0.0328976	0.386125	0.999466
RHNO1	-1.55558	0.000422644	0.304097	0.999466
CDCA8	-1.55738	0.000100571	0.0165354	0.999466
LOC100125542	-1.55909	0.0361308	0.271764	0.999466
VCAN	-1.56276	1.73257e-20	-0.870232	0.999466
CDC6	-1.56294	0.0324775	-0.801454	0.999466
DPYSL3	-1.56657	3.01362e-07	-0.485427	0.999466
PLEKHA6	-1.56789	0.0102292	-0.723482	0.999466
LOC100518170	-1.57829	7.21576e-08	0.120732	0.999466
LUM	-1.58284	1.13037e-33	-0.788923	0.938582
CALCR	-1.58496	0.0016332	-0.902976	0.999466
HJURP	-1.58496	0.00903425	0.494765	0.999466
CENPF	-1.58496	5.37132e-06	-0.300509	0.999466
TOP2A	-1.59132	1.6668e-07	-0.128261	0.999466
CCNB2	-1.59418	0.0376429	0.465664	0.999466
CENPA	-1.59709	0.00602805	0.33039	0.999466
KIF11	-1.60426	1.3541e-07	-0.415037	0.999466
IGLL5	-1.61048	0.00151621	-0.155059	0.999466
ESPL1	-1.61193	0.00108244	0.095759	0.999466
GSG2	-1.61298	0.0489527	-0.108253	0.999466
NOX5	-1.62803	8.19672e-06	-0.517514	0.999466
NOV	-1.63205	3.49498e-05	-0.363012	0.999466
C14H10orf105	-1.64636	0.0381539	0.174029	0.999466
SPRN	-1.64909	3.49347e-05	-0.532542	0.999466
FBN3	-1.66582	5.32621e-11	-0.267104	0.999466
SPRY3	-1.66802	0.000754543	-1.39734	0.660872
ANLN	-1.67029	2.60423e-05	-0.316474	0.999466
CRLF1	-1.67229	4.89539e-05	-0.353515	0.999466
ASF1B	-1.67529	1.49133e-06	-0.317641	0.999466
DLGAP5	-1.68226	8.51867e-05	0.16711	0.999466
RNF213	-1.68437	0.00497725	-0.503433	0.999466
CNN1	-1.68466	5.86813e-11	-0.517205	0.999466
FOXM1	-1.6865	0.000409523	-0.652981	0.999466
GPT2	-1.68706	0.00212541	0.355095	0.999466
PSPH	-1.6942	4.62947e-06	-0.284746	0.999466
RRM2	-1.69815	1.27056e-10	-0.0680975	0.999466
TICRR	-1.71049	0.0465646	0.273018	0.999466
CHAF1B	-1.71272	0.00834896	0.505235	0.999466
BUB1B	-1.72016	0.00142418	-0.367545	0.999466
STC2	-1.72102	0.0254516	0.432525	0.999466
SCML4	-1.72583	0.00070623	-0.371969	0.999466
SORCS2	-1.72723	6.42269e-07	-0.863938	0.999466
FGF6	-1.73255	8.72038e-07	-0.311314	0.999466
KCNT2	-1.73697	0.0284382	-1.14439	0.999466
TBX21	-1.74935	0.00283418	0.415037	0.999466
DDX11	-1.76296	0.000553856	-0.477047	0.999466
KIF18B	-1.76768	0.000369007	-0.337358	0.999466
EPHB2	-1.76833	1.38263e-06	-0.0150282	0.999466
RAD54L	-1.77923	0.0124621	-1.3155	0.999466
SHOX2	-1.78106	0.00364767	-1.5025	0.397783
CCNB3	-1.78427	0.0449533	0.0458037	0.999466
NRK	-1.78469	5.19914e-07	-0.596644	0.999466
KIF15	-1.7866	0.000553878	-0.540568	0.999466
LOC100154873	-1.78799	0.0040017	-0.928107	0.862677
ATF5	-1.80263	1.75795e-07	-0.359167	0.999466
CRABP1	-1.80735	0.0452808	0.607683	0.999466
POLE2	-1.80735	0.0382024	0.510615	0.999466
LOC110261138	-1.80735	0.0341523	0.36257	0.999466
PCK2	-1.81561	2.34506e-07	-0.491659	0.999466
ZNF469	-1.82782	5.96604e-05	0.180572	0.999466
KNTC1	-1.83007	0.00180966	-0.656046	0.999466
MSTRG.1566	-1.84405	0.000108146	0.307509	0.999466
KRT80	-1.85704	0.00109597	-1.01408	0.999466
CBS	-1.86148	0.00558495	-0.706708	0.999466
MSTRG.15145	-1.87138	0.00399947	-0.552541	0.999466
MSTRG.10540	-1.88486	0.0309	-0.141853	0.999466
IGSF10	-1.91427	0.0102292	-1.41504	0.999466
MELK	-1.95156	0.000487845	-0.0114956	0.999466
HIF3A	-1.95936	0.0336928	-1.54749	0.999466
MKX	-1.98606	0.0226867	0.479993	0.999466
MSTRG.4196	-1.99735	0.000352643	1.53201	0.999466
DHH	-2	0.0131103	-0.807355	0.999466
COL1A1	-2.00288	0.030602	-0.379321	0.999466
NECTIN1	-2.00529	0.00176527	-0.412939	0.999466
FBN2	-2.01134	8.17155e-06	-0.534657	0.999466
PASK	-2.02237	0.0168918	-0.0946369	0.999466
LTF	-2.02975	0.0213199	-0.275634	0.999466
DIAPH3	-2.03242	0.000203084	-0.263034	0.999466
MSTRG.4763	-2.03634	0.045023	-0.807355	0.999466
FRAS1	-2.04532	2.54919e-26	-0.800475	0.999466
MSTRG.15678	-2.05461	0.00824345	-0.800646	0.999466
POSTN	-2.06087	4.04258e-10	-0.457801	0.999466
HSD11B2	-2.0651	0.0019977	-0.122484	0.999466
KNL1	-2.09311	0.000534001	-0.505235	0.999466
LOC110256000	-2.15325	0.00140556	-1.69635	0.597393
RNF213	-2.15959	0.0138413	-0.547066	0.999466
CLCN5	-2.16189	0.00646127	0.283172	0.999466
SGO1	-2.16993	0.00929326	0.0450879	0.999466
ASNS	-2.17349	6.55532e-11	0.0679337	0.999466
ACOT7	-2.18161	0.000387968	0.051024	0.999466
RDH5	-2.21945	0.0120726	-1.61035	0.479781
TRIL	-2.24393	0.000516328	-1.1896	0.999466
ADAMTS8	-2.26891	5.42257e-17	-0.843145	0.999466
TMEM59L	-2.27684	0.0037082	-1.0335	0.999466
SHCBP1	-2.29039	8.67423e-05	-0.314109	0.999466
POLE	-2.29155	4.16002e-15	-0.509014	0.999466
E2F7	-2.33703	0.000352813	-0.301656	0.999466
PENK	-2.35148	6.43735e-18	-0.859059	0.903618
PCSK9	-2.35908	4.12112e-05	-1.32193	0.999466
LOC110259517	-2.38247	0.00982357	2.58496	0.999466
LOC100523909	-2.38494	0.000387554	-1.848	0.999466
LOC100522551	-2.38702	0.0334026	-0.930737	0.999466
FMOD	-2.39787	0.029208	-0.578226	0.999466
LOC100521789	-2.41774	0.00197242	0.00972826	0.999466
FAM124A	-2.42004	4.58262e-11	-1.1343	0.40991
ADRA2A	-2.44294	0.0226768	-0.559427	0.999466
DACH2	-2.44478	0.0336699	-1.37851	0.999466
WISP1	-2.46366	0.00582484	-0.0506261	0.999466
CACNA1E	-2.5025	0.0345603	-0.929611	0.999466
SH3TC2	-2.5025	0.0264686	-0.534336	0.999466
COCH	-2.53051	0.0299978	1.1375	0.999466
PHGDH	-2.53102	6.73324e-57	0.459302	0.999466
OLFM3	-2.58496	0.0208033	-1.44746	0.999466
LOC100511114	-2.65711	0.0115416	-0.534336	0.999466
ACE2	-2.71823	0.000351878	-2.4319	0.999466
PRSS35	-2.72489	0.0203807	-0.146841	0.999466
TNC	-2.73318	0.00253224	-0.459776	0.999466
MSTRG.14949	-2.7587	0.000418761	0.871267	0.999466
FASN	-2.86848	2.80604e-18	-2.11495	0.0862431
COL11A1	-2.92722	0.0124621	-0.607993	0.999466
FAM69C	-2.96347	0.0386397	-1.66297	0.999466
ANGPTL5	-3.08746	0.0051103	-0.691878	0.999466
TNFSF18	-3.11548	0.0385876	0.263034	0.999466
LOC100513976	-3.1867	0.000428667	0.628031	0.999466
GRIA1	-3.42626	0.0431702	-0.459432	0.999466
SCX	-3.46366	0.00142418	0.142019	0.999466
LOC100153139	-3.49033	0.00119963	-0.813904	0.999466
IGHV3-23	-3.49957	2.07186e-05	-1.96849	0.999466
PGLYRP2	-3.85345	0.000196389	-0.643856	0.999466
TNMD	-3.908	0.0485042	0.0564133	0.999466
IGKV1-6	-4.09482	0.0145451	-1.57777	0.999466
MSTRG.9936	-4.30914	0.000684813	0.633872	0.999466
BRINP1	-4.32193	0.0189753	1.58496	0.999466
ACAN	-4.33985	0.0290913	0	0.999466
LOC100156167	-4.43857	5.53864e-06	1.48829	0.999466
APOC3	-4.52686	0.0102292	-1.5616	0.999466
MSTRG.9671	-4.61275	2.16326e-06	-0.461448	0.999466
LOC100516587	-4.65105	0.03108	5.32193	0.999466
OIT3	-6.73697	0.0390175	0	1
F7	-7.1964	0.0463075	2.16993	0.999466
SLCO1A2	-7.43741	0.00222649	-1.80735	0.999466
ORM1	-9.51833	0.000812454	-2.89482	0.999466
LOC100152299	-9.56986	0.000854688	3.64386	0.999466
HGFAC	-9.74147	0.0222336	-2.80735	0.999466

## Sheet: Table S8
Table S8 GO terms of DEGs shared in LW and MS pig at 25℃ and 4℃
GO ID	Description	Category	Gene number	P value	Genes
GO:0106106	cold-induced thermogenesis	Biology process	4	1e-06	ARRDC3, ADRB2, CEBPB, NR1D1
GO:0031649	heat generation	Biology process	2	2.5e-05	ARRDC3, ADRB2
GO:0009892	negative regulation of metabolic process	Biology process	8	4.5e-05	ARRDC3, CEBPB, NR1D1, SIK1, NR4A2, CIART, KLF10, TIPARP,
GO:0006629	lipid metabolic process	Biology process	5	0.000556	NR1D1, SIK1, GPCPD1, SCD, TIPARP
GO:0016051	carbohydrate biosynthetic process	Biology process	2	0.00538	NR1D1, SIK1

## Sheet: Table S9
Table S9 GO terms of specific DEGs in MS pig at 25℃ and 4℃
GO ID	Description	Category	Gene number	P value	Genes
GO:0020027	hemoglobin metabolic process	Biology process	1	0.0127	ALAS2
GO:0002250	adaptive immune response	Biology process	2	0.00154	DUSP10; IL18
GO:0044449	contractile fiber part	Biology process	2	0.00568	ACTC1; ANKRD1
GO:0015671	oxygen transport	Biology process	1	0.0104	HBB
GO:0051049	regulation of transport	Biology process	4	0.0309	ANKRD1; PRSS8; NEFH; KCNC4

## Sheet: Sheet10
Table S10 GO terms of specific DEGs in LW pig at 25℃ and 4℃
GO ID	Description	Category	Gene number	P value	Genes
GO:0106106	cold-induced thermogenesis	Biology process	4	0.011825	ACSL1, CD36, ELOVL6, PPARGC1A
GO:0034440	lipid oxidation	Biology process	4	0.002442	CPT2, IRS2, HADHB, ACADM
GO:0044242	cellular lipid catabolic process	Biology process	6	0.030296	CPT2, IRS2, HADHB, ACADM, PCK2, APOC3
GO:0046324	regulation of glucose import	Biology process	3	0.036192	IRS2, IGF1, HK2
GO:0010675	regulation of cellular carbohydrate metabolic process	Biology process	3	0.034454	IRS2, ACADM, IGF1

[truncated: 5 more sheets: Table S11, Table S12, Table S13, Table S14, Table S15]
